# Supplementary material for: Comprehensive MicroRNAome Analysis of the Relationship Between Alzheimer Disease and Cancer in PSEN Double-Knockout Mice
Source: PubMed Central journal article supplement — Int Neurourol J. 2018 Dec 31;22(4):237–45. doi: 10.5213/inj.1836274.137 (PMC6312969; doi:10.5213/inj.1836274.137), 2018-12-31
Supplement: inj-1836274-137-suppl1.pdf [file inj-1836274-137-suppl1.pdf]

## SUPPLEMENTARY MATERIALS

**Supplementary Table 1.** 7+18-M miRNAs related to cancer pathway

| miRNA      | Fold change | oc/ts | Related cancers                                                                                          | Reference     |
|------------|-------------|-------|----------------------------------------------------------------------------------------------------------|---------------|
| miR-103    | 3.997       | oc/ts | OC: gastric cancer, <i>in vitro</i> , <i>in vivo</i><br>TS: lung tumor, <i>in vitro</i> , <i>in vivo</i> | [1,2]         |
| miR-128a   | 2.31        | ts    | triple-negative breast cancer, <i>in vivo</i> , <i>in vitro</i>                                          | [3]           |
| miR-136    | 1.737       | ts    | triple-negative breast cancer, <i>in vivo</i> , <i>in vitro</i>                                          | [4]           |
| miR-139-5p | 2.865       | ts    | colorectal cancer, <i>in vitro</i> , <i>in vivo</i>                                                      | [5]           |
| miR-140    | 2.409       | ts    | non-small cell lung cancer, <i>in vitro</i> , <i>in vivo</i>                                             | [6]           |
| miR-142-3p | 6.718       | ts    | cervical cancer cells, <i>in vitro</i>                                                                   | [7]           |
| miR-153    | 3.332       | ts    | colon cancer cells, <i>in vitro</i> , <i>in vivo</i>                                                     | [8]           |
| miR-181a   | 1.358       | oc/ts | breast cancer                                                                                            | [9] (Review)  |
| miR-190    | 2.724       | ts    | breast cancer metastasis, <i>in vitro</i> , <i>in vivo</i>                                               | [10]          |
| miR-204    | 1.458       | ts    | bladder cancer, <i>in vitro</i> / breast cancer <i>in vivo</i> , <i>in vitro</i>                         | [11,12]       |
| miR-207    | 0.699       | N/A   | miR-207 enhances ionizing radiation-induced apoptosis by directly targeting Akt3                         | [13]          |
| miR-218    | 5.787       | ts    | gastric cancer, <i>in vitro</i> , <i>in vivo</i>                                                         | [14]          |
| miR-219    | 1.938       | ts    | non-small cell lung cancer, <i>in vitro</i>                                                              | [15]          |
| miR-29b    | 2.715       | oc/ts | prostate, breast, lung, colon, ovarian, etc.                                                             | [16] (Review) |
| miR-29c    | 3.463       | ts    | pancreatic cancer, <i>in vitro</i>                                                                       | [17]          |
| miR-300    | 1.929       | oc    | breast cancer, <i>in vitro</i> , <i>in vivo</i>                                                          | [18]          |
| miR-30e*   | 3.431       | oc    | prostate cancer, <i>in vitro</i> , <i>in vivo</i>                                                        | [19]          |
| miR-34b-5p | 1.65        | ts    | thyroid carcinoma, <i>in vitro</i>                                                                       | [20]          |
| miR-369-3p | 3.346       | oc    | papillary thyroid cancer, <i>in vitro</i>                                                                | [21]          |
| miR-377    | 1.79        | ts    | esophageal cancer, <i>in vitro</i> , <i>in vivo</i>                                                      | [22]          |
| miR-381    | 2.722       | ts    | breast cancer, <i>in vitro</i>                                                                           | [23]          |
| miR-709    | 1.834       | ts    | T cell acute lymphoblastic leukemia, <i>in vivo</i>                                                      | [24]          |
| miR-9      | 2.592       | oc    | non-small cell lung cancer, <i>in vitro</i>                                                              | [25]          |

Fold change, dKO / WT ratio in 18 months aged mice; oc, oncogenic miRNA; ts, tumor suppressor miRNA; N/A, unable to define its distinct role; some information were drawn from review articles.

miR-#\* can be interpreted as miR-#-3p.

**Supplementary Table 2.** 18-M miRNAs related to Cancer pathway

| miRNA      | Fold change | oc/ts | Related Cancers                                                                                                                                                   | Reference     |
|------------|-------------|-------|-------------------------------------------------------------------------------------------------------------------------------------------------------------------|---------------|
| let-7a*    | 1.746       | N/A   | let7a-3p activated by Ago3, might negatively regulate RAB10 (a member of Ras oncogene family)                                                                     | [26]          |
| let-7b     | 2.719       | ts    | malignant melanoma (cutaneous melanoma), <i>in vitro</i>                                                                                                          | [27]          |
| miR-106a   | 2.596       | oc/ts | OC: endometrial adenocarcinoma, <i>in vitro, in vivo</i><br>TS: colorectal cancer, <i>in vitro, in vivo</i>                                                       | [28,29]       |
| miR-106b   | 2.175       | oc    | breast cancer, <i>in vitro, in vivo</i>                                                                                                                           | [30]          |
| miR-129-5p | 2.153       | ts    | gastric cancer, <i>in vitro, in vivo</i>                                                                                                                          | [31]          |
| miR-130a   | 2.444       | oc/ts | OC: gastric cancer, osteosarcoma<br>TS: breast cancer                                                                                                             | [32] (Review) |
| miR-132    | 1.588       | ts    | lung cancer, <i>in vitro, in vivo</i>                                                                                                                             | [33]          |
| miR-148b   | 2.569       | ts    | hepatocellular carcinoma, <i>in vitro, in vivo</i>                                                                                                                | [34]          |
| miR-152    | 2.748       | ts    | colorectal cancer, <i>in vitro, in vivo</i>                                                                                                                       | [35]          |
| miR-15a    | 5.259       | ts    | non-small cell lung cancer, <i>in vitro</i>                                                                                                                       | [36]          |
| miR-16     | 3.263       | ts    | colorectal cancer, <i>in vitro</i>                                                                                                                                | [37]          |
| miR-185    | 2.278       | ts    | non-small cell lung cancer, <i>in vitro, in vivo</i>                                                                                                              | [38]          |
| miR-193    | 4.311       | ts    | acute myeloid leukemia, <i>in vitro</i>                                                                                                                           | [39]          |
| miR-195    | 4.403       | ts    | non-small cell lung cancer, <i>in vitro, in vivo</i>                                                                                                              | [40]          |
| miR-19a    | 4.235       | oc    | colorectal cancer, <i>in vitro, in vivo</i>                                                                                                                       | [41]          |
| miR-20a    | 2.941       | ts    | breast cancer, <i>in vitro, in vivo</i>                                                                                                                           | [42]          |
| miR-22*    | 2.231       | ts    | hepatocellular carcinoma, <i>in vitro</i>                                                                                                                         | [43]          |
| miR-222    | 3.202       | oc/ts | OC: thyroid papillary, breast, hepatocellular carcinoma, lung cancer<br>TS: oral tongue squamous cell carcinoma, erythroleukemic cell                             | [44] (Review) |
| miR-24     | 1.694       | oc/ts | OC: breast cancer, <i>in vitro, in vivo</i><br>TS: gastric cancer, <i>in vitro, in vivo</i>                                                                       | [45,46]       |
| miR-26a    | 1.871       | ts    | hepatocellular carcinoma, <i>in vitro, in vivo</i>                                                                                                                | [47]          |
| miR-27b    | 3.646       | oc/ts | OC: glioma, cervical cancer, breast cancer<br>TS: lung adenocarcinoma, prostate cancer, colorectal cancer, acute myeloid leukemia, gastric cancer, bladder cancer | [48] (Review) |
| miR-29a    | 1.681       | oc/ts | OC: breast cancer, <i>in vitro</i><br>TS: gastric cancer, <i>in vitro</i>                                                                                         | [49,50]       |
| miR-301a   | 3.121       | oc    | prostate cancer, <i>in vitro, in vivo</i>                                                                                                                         | [51]          |
| miR-30a    | 3.935       | ts    | lung cancer, <i>in vitro, in vivo</i>                                                                                                                             | [52]          |
| miR-30b    | 2.031       | ts    | gastric cancer, <i>in vitro, in vivo</i>                                                                                                                          | [53]          |
| miR-30e    | 2.193       | ts    | breast cancer, <i>in vitro, in vivo</i>                                                                                                                           | [54]          |
| miR-329    | 1.947       | ts    | neuroblastoma, <i>in vitro</i>                                                                                                                                    | [55]          |
| miR-335-5p | 2.701       | ts    | gastric cancer, <i>in vitro</i>                                                                                                                                   | [56]          |
| miR-338-3p | 4.351       | ts    | gastric cancer, <i>in vitro, in vivo</i>                                                                                                                          | [57]          |
| miR-338-5p | 1.862       | ts    | hepatocellular carcinoma, <i>in vitro</i>                                                                                                                         | [58]          |
| miR-340-5p | 1.344       | ts    | colorectal cancer, <i>in vitro</i>                                                                                                                                | [59]          |
| miR-350    | 2.831       | N/A   | mir-350 can inhibit JNK and p38 pathways and result in hypertrophy of cardiomyocytes                                                                              | [60]          |
| miR-365    | 2.969       | oc/ts | OC: breast cancer, <i>in vitro</i> , cutaneous squamous cell carcinoma, <i>in vitro, in vivo</i><br>TS: colon cancer, <i>in vitro, in vivo</i>                    | [61-63]       |
| miR-374    | 1.716       | ts    | squamous cell carcinoma, <i>in vitro</i>                                                                                                                          | [64]          |
| miR-487b   | 3.492       | oc    | lung cancer, <i>in vitro, in vivo</i>                                                                                                                             | [65]          |
| miR-676    | 1.613       | N/A   | indirectly regulated by the level of p53                                                                                                                          | [66]          |
| miR-7a     | 3.464       | oc/ts | OC: renal, oral<br>TS: breast, lung, colorectal, cervical, etc.                                                                                                   | [67] (Review) |
| miR-7b     | 4.552       | oc/ts | OC: renal, oral<br>TS: breast, lung, colorectal, cervical, etc.                                                                                                   | [67] (Review) |
| miR-9*     | 1.987       | ts    | gastric cancer, <i>in vitro</i>                                                                                                                                   | [68]          |

Fold change, dKO/WT ratio in 18 months aged mice. oc, oncogenic miRNA; ts, tumor suppressor miRNA; N/A, unable to define its distinct role; some information were drawn from review articles. miR-#\* can be interpreted as miR-#-3p.

## REFERENCES

1. Zheng J, Liu Y, Qiao Y, Zhang L, Lu S. miR-103 Promotes Proliferation and Metastasis by Targeting KLF4 in Gastric Cancer. *Int J Mol Sci* 2017;18(5). pii: E910. <https://doi.org/10.3390/ijms18050910>.
2. Yang D, Wang JJ, Li JS, Xu QY. miR-103 Functions as a Tumor Suppressor by Directly Targeting Programmed Cell Death 10 in NSCLC. *Oncol Res* 2018;26:519-28.
3. Xiao M, Lou C, Xiao H, Yang Y, Cai X, Li C, et al. MiR-128 regulation of glucose metabolism and cell proliferation in triple-negative breast cancer. *Br J Surg* 2018;105:75-85.
4. Yan M, Li X, Tong D, Han C, Zhao R, He Y, et al. miR-136 suppresses tumor invasion and metastasis by targeting RASAL2 in triple-negative breast cancer. *Oncol Rep* 2016;36:65-71.
5. Zhang L, Dong Y, Zhu N, Tsoi H, Zhao Z, Wu CW, et al. microRNA-139-5p exerts tumor suppressor function by targeting NOTCH1 in colorectal cancer. *Mol Cancer* 2014;13:124.
6. Yuan Y, Shen Y, Xue L, Fan H. miR-140 suppresses tumor growth and metastasis of non-small cell lung cancer by targeting insulin-like growth factor 1 receptor. *PLoS One* 2013;8:e73604.
7. Deng B, Zhang Y, Zhang S, Wen F, Miao Y, Guo K. MicroRNA-142-3p inhibits cell proliferation and invasion of cervical cancer cells by targeting FZD7. *Tumour Biol* 2015;36:8065-73.
8. Huang Q, Xia J, Wang L, Wang X, Ma X, Deng Q, et al. miR-153 suppresses IDO1 expression and enhances CAR T cell immunotherapy. *J Hematol Oncol* 2018;11:58.
9. Yang C, Tabatabaei SN, Ruan X, Hardy P. The Dual Regulatory Role of MiR-181a in Breast Cancer. *Cell Physiol Biochem* 2017;44: 843-56.
10. Yu Y, Luo W, Yang ZJ, Chi JR, Li YR, Ding Y, et al. miR-190 suppresses breast cancer metastasis by regulation of TGF- $\beta$ -induced epithelial-mesenchymal transition. *Mol Cancer* 2018;17:70.
11. Hwang TI, Lin JF, Lin YC, Chen HE, Chou KY, Tsai TF. miR-204 acts as a tumor suppressor in human bladder cancer cell T24 by targeting antiapoptotic BCL2. *Urol Sci* 2016;27:101-8.
12. Liu J, Li Y. Trichostatin A and Tamoxifen inhibit breast cancer cell growth by miR-204 and ER $\alpha$  reducing AKT/mTOR pathway. *Biochem Biophys Res Commun* 2015;467:242-7.
13. Tan PX, Du SS, Ren C, Yao QW, Zheng R, Li R, et al. MicroRNA-207 enhances radiation-induced apoptosis by directly targeting Akt3 in cochlea hair cells. *Cell Death Dis* 2014;5:e1433.
14. Tie J, Pan Y, Zhao L, Wu K, Liu J, Sun S, et al. MiR-218 inhibits invasion and metastasis of gastric cancer by targeting the Robo1 receptor. *PLoS Genet* 2010;6:e1000879.
15. Sun X, Xu M, Liu H, Ming K. MicroRNA-219 is downregulated in non-small cell lung cancer and inhibits cell growth and metastasis by targeting HMGA2. *Mol Med Rep* 2017;16:3557-64.
16. Yan B, Guo Q, Fu FJ, Wang Z, Yin Z, Wei YB, et al. The role of miR-29b in cancer: regulation, function, and signaling. *Onco Targets Ther* 2015;8:539-48.
17. Lu Y, Hu J, Sun W, Li S, Deng S, Li M. MiR-29c inhibits cell growth, invasion, and migration of pancreatic cancer by targeting ITGB1. *Onco Targets Ther* 2015;9:99-109.
18. Xu XH, Li DW, Feng H, Chen HM, Song YQ. MiR-300 regulate the malignancy of breast cancer by targeting p53. *Int J Clin Exp Med* 2015;8:6957-66.
19. Egan SM, Karasik E, Ellis L, Gollnick SO. miR-30e\* is overexpressed in prostate cancer and promotes NF- $\kappa$ B-mediated proliferation and tumor growth. *Oncotarget* 2017;8:67626-38.
20. Maroof H, Islam F, Ariana A, Gopalan V, Lam AK. The roles of microRNA-34b-5p in angiogenesis of thyroid carcinoma. *Endocrine* 2017;58:153-66.
21. Liu C, Su C, Chen Y, Li G. MiR-144-3p promotes the tumor growth and metastasis of papillary thyroid carcinoma by targeting paired box gene 8. *Cancer Cell Int* 2018;18:54.
22. Li B, Xu WW, Han L, Chan KT, Tsao SW, Lee NPY, et al. MicroRNA-377 suppresses initiation and progression of esophageal cancer by inhibiting CD133 and VEGF. *Oncogene* 2017;36:3986-4000.
23. Xue Y, Xu W, Zhao W, Wang W, Zhang D, Wu P. miR-381 inhibited breast cancer cells proliferation, epithelial-to-mesenchymal transition and metastasis by targeting CXCR4. *Biomed Pharmacother* 2017;86:426-33.
24. Li X, Sanda T, Look AT, Novina CD, von Boehmer H. Repression of tumor suppressor miR-451 is essential for NOTCH1-induced oncogenesis in T-ALL. *J Exp Med* 2011;208:663-75.
25. Han L, Wang W, Ding W, Zhang L. MiR-9 is involved in TGF- $\beta$ 1-induced lung cancer cell invasion and adhesion by targeting SOX7. *J Cell Mol Med* 2017;21:2000-8.
26. Winter J, Diederichs S. Argonaute-3 activates the let-7a passenger strand microRNA. *RNA Biol* 2013;10:1631-43.
27. Schultz J, Lorenz P, Gross G, Ibrahim S, Kunz M. MicroRNA let-7b targets important cell cycle molecules in malignant melanoma cells and interferes with anchorage-independent growth. *Cell Res* 2008;18:549-57.
28. Tang W, Li J, Liu H, Zhou F, Liu M. MiR-106a promotes tumor growth, migration, and invasion by targeting BCL2L1 in human endometrial adenocarcinoma. *Am J Transl Res* 2017;9:4984-93.
29. Hao H, Xia G, Wang C, Zhong F, Liu L, Zhang D. miR-106a suppresses tumor cells death in colorectal cancer through targeting ATG7. *Med Mol Morphol* 2017;50:76-85.

30. Li N, Miao Y, Shan Y, Liu B, Li Y, Zhao L, et al. MiR-106b and miR-93 regulate cell progression by suppression of PTEN via PI3K/Akt pathway in breast cancer. *Cell Death Dis* 2017;8:e2796.
31. Yan L, Sun K, Liu Y, Liang J, Cai K, Gui J. MiR-129-5p influences the progression of gastric cancer cells through interacting with SPOCK1. *Tumour Biol* 2017;39:1010428317706916.
32. Zhang HD, Jiang LH, Sun DW, Li J, Ji ZL. The role of miR-130a in cancer. *Breast Cancer* 2017;24:521-7.
33. Li Y, Zu L, Wang Y, Wang M, Chen P, Zhou Q. miR-132 inhibits lung cancer cell migration and invasion by targeting SOX4. *J Thorac Dis* 2015;7:1563-9.
34. Zhang JG, Shi Y, Hong DF, Song M, Huang D, Wang CY, et al. MiR-148b suppresses cell proliferation and invasion in hepatocellular carcinoma by targeting WNT1/ $\beta$ -catenin pathway. *Sci Rep* 2015;5:8087.
35. Li B, Xie Z, Li B. miR-152 functions as a tumor suppressor in colorectal cancer by targeting PIK3R3. *Tumour Biol* 2016;37:10075-84.
36. He J. Knocking down MiR-15a expression promotes the occurrence and development and induces the EMT of NSCLC cells in vitro. *Saudi J Biol Sci* 2017;24:1859-65.
37. You C, Liang H, Sun W, Li J, Liu Y, Fan Q, et al. Deregulation of the miR-16-KRAS axis promotes colorectal cancer. *Sci Rep* 2016;6:37459.
38. Li S, Ma Y, Hou X, Liu Y, Li K, Xu S, et al. MiR-185 acts as a tumor suppressor by targeting AKT1 in non-small cell lung cancer cells. *Int J Clin Exp Pathol* 2015;8:11854-62.
39. Krowiorz K, Jammal R, Emmrich S, Rouhi A, Heuser M, Bullinger L, et al. et al. The Mir-193 Family Antagonizes Stem Cell Pathways and Is a Potent Tumor Suppressor in Childhood and Adult Acute Myeloid Leukemia. *Blood* 2015;126: 1244.
40. Yu X, Zhang Y, Cavazos D, Ma X, Zhao Z, Du L, et al. miR-195 targets cyclin D3 and survivin to modulate the tumorigenesis of non-small cell lung cancer. *Cell Death Dis* 2018;9:193.
41. Liu Y, Liu R, Yang F, Cheng R, Chen X, Cui S, et al. miR-19a promotes colorectal cancer proliferation and migration by targeting TIA1. *Mol Cancer* 2017;16:53.
42. Si W, Shen J, Du C, Chen D, Gu X, Li C, et al. A miR-20a/MAPK1/c-Myc regulatory feedback loop regulates breast carcinogenesis and chemoresistance. *Cell Death Differ* 2018;25:406-20.
43. Li C, Ni J, Liu YX, Wang H, Liang ZQ, Wang X. Response of MiR-NA-22-3p and MiRNA-149-5p to Folate Deficiency and the Differential Regulation of MTHFR Expression in Normal and Cancerous Human Hepatocytes. *PLoS One* 2017;12:e0168049.
44. Garofalo M, Quintavalle C, Romano G, Croce CM, Condorelli G. miR221/222 in cancer: their role in tumor progression and response to therapy. *Curr Mol Med* 2012;12:27-33.
45. Du WW, Fang L, Li M, Yang X, Liang Y, Peng C, et al. MicroRNA miR-24 enhances tumor invasion and metastasis by targeting PTPN9 and PTPRF to promote EGF signaling. *J Cell Sci* 2013; 126(Pt 6):1440-53.
46. Duan Y, Hu L, Liu B, Yu B, Li J, Yan M, et al. Tumor suppressor miR-24 restrains gastric cancer progression by downregulating RegIV. *Mol Cancer* 2014;13:127.
47. Kota J, Chivukula RR, O'Donnell KA, Wentzel EA, Montgomery CL, Hwang HW, et al. Therapeutic microRNA delivery suppresses tumorigenesis in a murine liver cancer model. *Cell* 2009;137:1005-17.
48. Ding L, Ni J, Yang F, Huang L, Deng H, Wu Y, et al. Promising therapeutic role of miR-27b in tumor. *Tumour Biol* 2017;39: 101042831 7691657.
49. Pei YF, Lei Y, Liu XQ. MiR-29a promotes cell proliferation and EMT in breast cancer by targeting ten eleven translocation 1. *Biochim Biophys Acta* 2016;1862:2177-85.
50. Chen L, Xiao H, Wang ZH, Huang Y, Liu ZP, Ren H, et al. miR-29a suppresses growth and invasion of gastric cancer cells in vitro by targeting VEGF-A. *BMB Rep* 2014;47:39-44.
51. Nam RK, Benatar T, Wallis CJ, Amemiya Y, Yang W, Garbens A, et al. MiR-301a regulates E-cadherin expression and is predictive of prostate cancer recurrence. *Prostate* 2016;76:869-84.
52. Guan Y, Rao Z, Chen C. miR-30a suppresses lung cancer progression by targeting SIRT1. *Oncotarget* 2017;9:4924-34.
53. Zhu ED, Li N, Li BS, Li W, Zhang WJ, Mao XH, et al. miR-30b, down-regulated in gastric cancer, promotes apoptosis and suppresses tumor growth by targeting plasminogen activator inhibitor-1. *PLoS One* 2014;9:e106049.
54. Liu MM, Li Z, Han XD, Shi JH, Tu DY, Song W, et al. MiR-30e inhibits tumor growth and chemoresistance via targeting IRS1 in Breast Cancer. *Sci Rep* 2017;7:15929.
55. Yang H, Li Q, Zhao W, Yuan D, Zhao H, Zhou Y. miR-329 suppresses the growth and motility of neuroblastoma by targeting KDM1A. *FEBS Lett* 2014;588:192-7.
56. Sandoval-Bórquez A, Polakovicova I, Carrasco-Véliz N, Lobos-González L, Riquelme I, Carrasco-Avino G, et al. MicroRNA-335-5p is a potential suppressor of metastasis and invasion in gastric cancer. *Clin Epigenetics* 2017;9:114.
57. Sun F, Yu M, Yu J, Liu Z, Zhou X, Liu Y, et al. miR-338-3p functions as a tumor suppressor in gastric cancer by targeting PTP1B. *Cell Death Dis* 2018;9:522.
58. Zhao Y, Chen J, Wei W, Qi X, Li C, Ren J. The dual-inhibitory effect of miR-338-5p on the multidrug resistance and cell growth of hepatocellular carcinoma. *Signal Transduct Target Ther* 2018;3:3.

59. Yang L, Men WL, Yan KM, Tie J, Nie YZ, Xiao HJ. MiR-340-5p is a potential prognostic indicator of colorectal cancer and modulates ANXA3. *Eur Rev Med Pharmacol Sci* 2018;22:4837-45.
60. Ge Y, Pan S, Guan D, Yin H, Fan Y, Liu J, et al. MicroRNA-350 induces pathological heart hypertrophy by repressing both p38 and JNK pathways. *Biochim Biophys Acta* 2013;1832:1-10.
61. Li M, Liu L, Zang W, Wang Y, Du Y, Chen X, et al. miR-365 overexpression promotes cell proliferation and invasion by targeting ADAMTS-1 in breast cancer. *Int J Oncol* 2015;47:296-302.
62. Zhou M, Liu W, Ma S, Cao H, Peng X, Guo L, et al. A novel onco-miR-365 induces cutaneous squamous cell carcinoma. *Carcinogenesis* 2013;34:1653-9.
63. Nie J, Liu L, Zheng W, Chen L, Wu X, Xu Y, et al. microRNA-365, down-regulated in colon cancer, inhibits cell cycle progression and promotes apoptosis of colon cancer cells by probably targeting Cyclin D1 and Bcl-2. *Carcinogenesis* 2012;33:220-5.
64. Li XJ, Li ZF, Wang JJ, Han Z, Liu Z, Liu BG. Effects of microRNA-374 on proliferation, migration, invasion, and apoptosis of human SCC cells by targeting Gadd45a through P53 signaling pathway. *Biosci Rep* 2017;37.
65. Bao L, Lv L, Feng J, Chen Y, Wang X, Han S, et al. miR-487b-5p Regulates Temozolomide Resistance of Lung Cancer Cells Through LAMP2-Medicated Autophagy. *DNA Cell Biol* 2016;35:385-92.
66. Terrile M, Bryan K, Vaughan L, Hallsworth A, Webber H, Chesler L, et al. miRNA expression profiling of the murine TH-MYCN neuroblastoma model reveals similarities with human tumors and identifies novel candidate miRNAs. *PLoS One* 2011;6:e28356.
67. Zhao J, Tao Y, Zhou Y, Qin N, Chen C, Tian D, et al. MicroRNA-7: a promising new target in cancer therapy. *Cancer Cell Int* 2015;15:103.
68. Meng Q, Xiang L, Fu J, Chu X, Wang C, Yan B. Transcriptome profiling reveals miR-9-3p as a novel tumor suppressor in gastric cancer. *Oncotarget* 2017;8:37321-31.
